# Supplementary material for: Highly fluorescent peptide nanoribbon impregnated with Sn-porphyrin as a potent DNA sensor
Source: Royal Society of Chemistry journal article supplement (doi:10.1039/c3pp25337f), 2013-01-09
Supplement: c3pp25337f.pdf [file c3pp25337f.pdf]

## Supplementary Information

### Highly fluorescent peptide nanoribbons impregnated with Sn-porphyrin as a potent DNA sensor

By Sreenivasan Koliyat Parayil, Jooran Lee *and* Minjoong Yoon \*

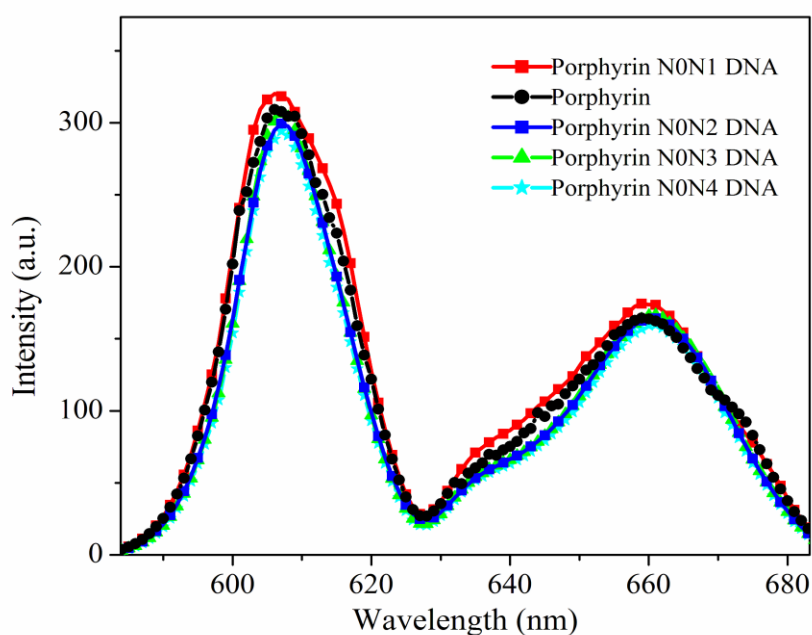

Fig S1. Fluorescence emission spectra of Sn-porphyrin in the presence of target DNA and non target DNA sequences. Concentration of DNAs was 5  $\mu$ M. The samples are excited at 430 nm.

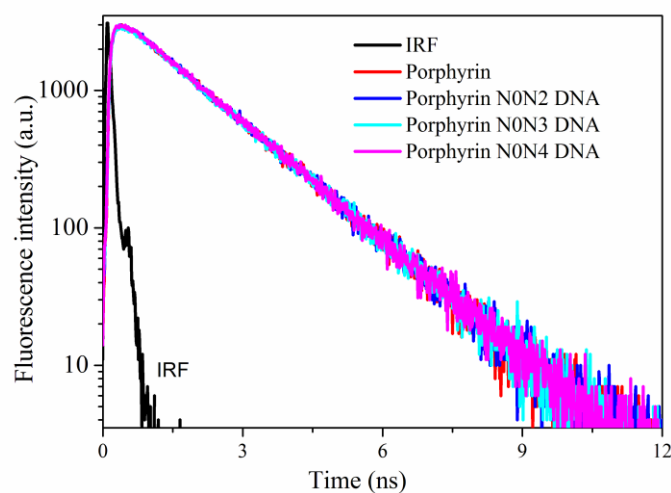

Fig S2. Fluorescence decay profile of Sn-porphyrin in the presence of non-target DNA sequences. The fluorescence emission was monitored at 610 nm. Concentration of DNAs was 5  $\mu\text{M}$ .

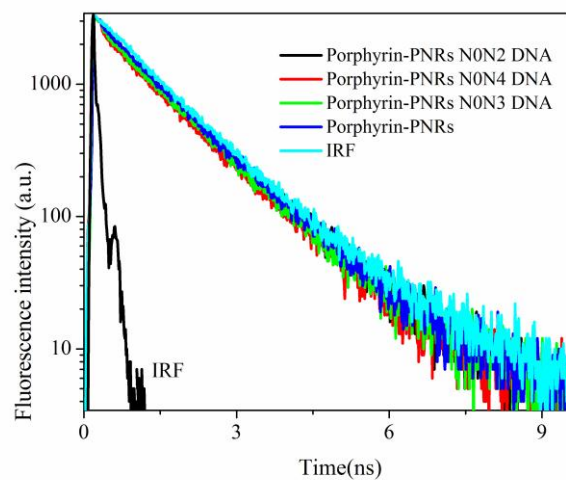

Fig S3. Fluorescence decay profile of Sn-porphyrin-PNRs in the presence of non-target DNA sequences. The fluorescence emission was monitored at 610 nm. Concentration of DNAs was 5  $\mu\text{M}$ .

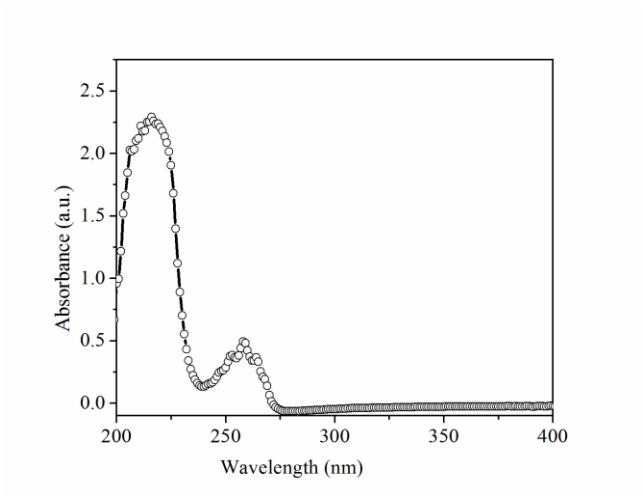

Fig. S4. Absorption spectra of diphenyl alanine peptide nanoribbons.
